# Supplementary material
Source: ML conference proceedings conference paper supplement (https://proceedings.mlr.press/v216/collins23a.html)
Supplement: Supplementary file 1 [file collins23a-supp.pdf]

---

# Human-in-the-Loop *Mixup* (Supplementary Material)

---

Katherine M. Collins\*<sup>1</sup> Umang Bhatt<sup>1,2</sup> Weiyang Liu<sup>1,3</sup> Vihari Piratla<sup>1</sup> Iliia Sucholutsky<sup>4</sup> Bradley Love<sup>2,5</sup>  
Adrian Weller<sup>1,2</sup>

<sup>1</sup>University of Cambridge

<sup>2</sup>The Alan Turing Institute

<sup>3</sup>Max Planck Institute for Intelligent Systems

<sup>4</sup>Princeton University

<sup>5</sup>University College London

## A RELATED WORK

Our work connects most closely to human-in-the-loop data augmentation and the expansive literature surrounding human categorical perception from the cognitive science community, as well as ongoing efforts in the machine learning community to develop more efficacious *mixup*-based data and label mixing functions.

### A.1 HUMAN-IN-THE-LOOP DATA AUGMENTATION

Incorporating expert feedback into the learning procedure has received increasing attention [Chen et al., 2022]. In particular, previous work has considered incorporating humans “in the loop” for data augmentation. For instance, DatasetGAN [Zhang et al., 2021] employs human participants to label GAN-generated images and feeds these back to the model to generate more synthetic data. [Kaushik et al., 2019] similarly incorporate human feedback by having humans *create* counterfactual samples, and has been shown to be an efficient method to adjust model behavior [Kaushik et al., 2021]. Other works have considered employing humans to provide “rationales” about examples to improve data-efficiency and downstream modeling performance [Zaidan et al., 2007]. Here, we marry these ideas in the context of *mixup* by eliciting data and label-mixing function parameters to align with human percepts.

### A.2 HUMAN CATEGORICAL PERCEPTION

In cognitive science, eliciting humans’ judgments over synthetically-constructed examples is a tried-and-true method to characterize human category boundaries [Newell and Bülthoff, 2002, Folstein et al., 2013, Feldman, 2021, Folstein et al., 2012]. Such studies often reveal a non-linear structure of humans’ percepts. For instance, in the audio domain, the identification of vowel categories has been found to demonstrate “warping” close to prototypical category members – known as the “perceptual magnet effect” [Kuhl, 1991, Feldman et al., 2009]. Similar nonlinearities have been found in the perception of boundaries between face identities [Beale and Keil, 1995] and the transitions between 3D shapes [Newell and Bülthoff, 2002, Destler et al., 2019]. Our linearly interpolated stimuli are similar in spirit to the morphological trajectories used in these works, as well as other synthetically-combined images [Oliva et al., 2006]. [Gruber et al., 2018] also consider 50/50 mixed images; however, their elicitation involves open-ended judgments which does not permit the same kind of data and label mixing alignment studies as our methods more directly elicit human-inferred generative parameters. Our work also connects to other non-linear perceptual phenomena encountered in the visual domain; namely, binocular rivalry, whereby present participants with a different image in each eye has been shown to induce oscillatory percepts [Blake and Logothetis, 2002, Tong et al., 2006].

---

\*Correspondence to: [kmc61@cam.ac.uk](mailto:kmc61@cam.ac.uk)

### A.3 OTHER MIXUP-BASED SYNTHETIC DATA SCHEMES

Many alternative *mixup* data and label mixing functions have been proposed [Verma et al., 2019, Yun et al., 2019, Kim et al., 2020a,b, Hendrycks et al., 2022]. Closest to our work, [Sohn et al., 2022] highlight particular issues with the linear interpolation in label space on the learned topology of the model’s category boundaries and instead utilize a Gaussian Mixture Model (GMM)-based relabeling scheme to construct “better” labels than those used in baseline *mixup*. Additional work on learning better pseudo-labels over *mixup* samples have been proposed [Arazo et al., 2020, Cascante-Bonilla et al., 2020, Sohn et al., 2020, Qiu et al., 2022]. Similarly, Between-class (BC) learning [Tokozume et al., 2017, 2018] proposes hand-crafted adjustments to label construction to better align with human perception based on waveform modulations; however, to our knowledge, no previous works have *directly* considered incorporating humans in-the-loop for either the construction of *mixup* samples or associated relabeling.

## B ADDITIONAL NOTES ON H-MIX

### B.1 HUMAN SUBJECT EXPERIMENTS

We include additional details on our human elicitation studies. For all experiments, we require participants speak English as a first-language and reside in the United States. Across all experiments, the mean age for participants was 37.5 years old ( $\pm$  standard deviation of 12.7 yrs). The self-reported sex breakdown was approximately 57% male and 43% female.

**Elicitation (RQ1)** Each participant sees a total of 32 mixed images, where the final two are repeats. Repeats are primarily used here to measure raters’ internal consistency<sup>1</sup>. The median time taken per participant per image as 9.30 and 11.01 seconds for the `Construct` and `Select-Shuffled` interfaces, respectively. A bonus was offered to encourage participants to provide responses which would match what other participants would provide; we applied this bonus to all participants post-hoc resulting in the average participant being paid at a rate of \$11.78.

**Multiple Interface Styles (RQ1)** Why do we consider two styles of elicitation interfaces? We reason that the first interface could be prone to ordering effects – an astute participant could realize that they can count out where the midpoint is located. This led us to design the second variety (`Select-Shuffled`) wherein the participant sees all images shuffled simultaneously. We hypothesize that `Construct` could induce responses biased by the participant’s starting position. To probe this, we run two sub-variants wherein participants start from either  $\lambda_f = 0.1$  or  $\lambda_f = 0.9$ .

**Elicitation (RQ2)** Each participant sees 59 – 62 images, where two images are repeated. Repeats are placed at the end and correspond to the images presented on trials 15 and 20, respectively<sup>2</sup>. The order of the images presented in a batch, as well as the order of the endpoint labels displayed for a given image, are shuffled across participants. We follow the same third-person perspective prompting in Section 3 from [Chung et al., 2019]. Participants are asked “what combinations of classes” they thought other participants would say is “used to make” each image, and “how confident” they thought other participants would be in their estimate. Responses are indicated on a slider per question. An example survey screen can be seen in Fig. 4. Subjects took a median of 8.41 seconds per image and were payed at a rate of \$8/hr, with an optional bonus which sought to encourage participants to provide calibrated confidence estimates, similar to that of [Vodrahalli et al., 2021]; the bonus was applied to all participants post-hoc. Each mixed image was seen by at least two different participants each. Our interface is depicted in Fig. 4.

### B.2 BREAK FROM MONOTONICTY

For users of `H-Mix`, it is worth noting that we do encounter some breaks with monotonicity (see Fig. 1) in a few of the aggregated “category boundaries.” We reason this could be in part due to several aspects of our set-up. First, our study involved irregular sampling across the space of mixing coefficients we consider: the 50/50 point is enriched. We ran two phases of elicitation: in the first, we sampled 6 image classes per pair to be shown for three mixing coefficients: 0.5, and one chosen randomly from each of the sets  $\{0.1, 0.25\}$  and  $\{0.75, 0.9\}$ , respectively (810 images of the 2070). All 1260

<sup>1</sup>Participants’ selections, for each interface type, change by a median of 0.1 in repeat trials, suggesting some inconsistencies in participants’ judgments which persists across elicitation method.

<sup>2</sup>We observe a median difference of 0.03 and 0.05 in the inferred mixing coefficient and confidence on repeat trials, indicative of high intra-annotator consistency.

other images are shown for a single mixing coefficient sampled uniformly from the set. Second, while we have human judgments for over 2000 total images, there are less than 50 synthetic images considered for each category pair, giving any participant noise – or the odd image – greater leverage to impact trends. We encourage others to use `HILL-MixE Suite` and continue to scale this work and elucidate the stability of the inferred mixing coefficient category boundaries we begin to hint at here.

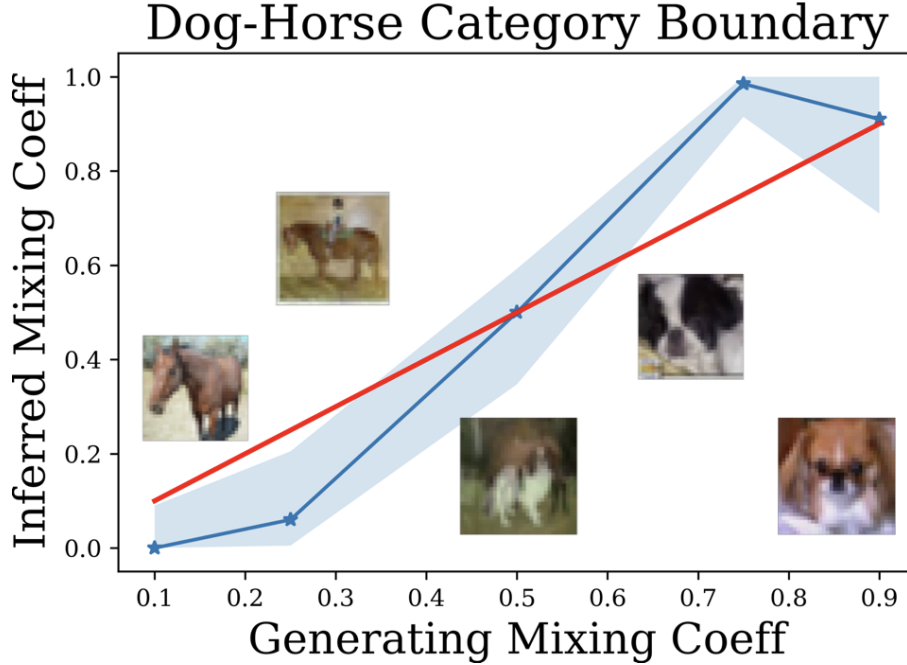

Figure 1: Category boundary elicited from human participants involves a break with monotonicity.

## C CONFIDENCE-BASED SMOOTHING DETAILS

We include further details of our methodology for leveraging human-provided confidence to construct  $\tilde{y}$  introduced in Section 5. Human-derived soft labels have been demonstrated to be valuable for learning [Nguyen et al., 2013, Peterson et al., 2019, Collins et al., 2022, Sanders et al., 2022]. We transform humans’ reported confidence into a smoothing parameter to induce softness using an exponentially-decaying function of human-provided confidence  $\omega$ :  $a * (b^\omega)$ ; here,  $a = 50, b = 0.0001$ . We use the transformed confidence for additive smoothing on the two-category  $\tilde{y}$ , spread mass accordingly across the full gamut of classes. That is, we use smooth the mass between a completely uniform distribution and a “two-hot” label which uses the human-derived relabeling. Parameters  $a, b$  are selected using a held-out set of regular CIFAR-10 images (from  $a \in \{5, 10, 15, 25, 50, 100\}, b \in \{0.00001, 0.0001, 0.001, 0.01, 0.1\}$ ). We recommend the consideration of alternate smoothing functions, which could, for instance, account for miscalibration in humans’ reported confidence.

Further, we compare the impact of learning with aggregated versus de-aggregated participants’ predictions. In Section 5, we considered learning with relabelings averaged across participants for a mixed image, and smoothed with confidence reports averaged across participants. Here, we consider instead separating out participants’ responses to learn with individual relabelings smoothed by individual confidence, closely related to [Wei et al., 2022]. We find in Table 1 that learning with *de-aggregated* data could potentially offer greater performance gains. However, as [Wei et al., 2022] discuss: whether to aggregate can depend on many factors. Our empirical findings support the need for tailoring label construction in context.

Table 1: Varying whether to aggregate when using incorporating human confidence  $\omega$  in label construction.

| Label Type                      | CE               | FGSM             | Calib            |
|---------------------------------|------------------|------------------|------------------|
| Ours (Avg with $\omega$ )       | 1.48±0.06        | 8.89±1.59        | <b>0.19±0.01</b> |
| Ours (Separated with $\omega$ ) | <b>1.44±0.11</b> | <b>8.33±1.92</b> | <b>0.19±0.01</b> |

## D INTERFACES INCLUDED IN HILL MIXE SUITE

We display sample pages of the interfaces created and used in this work, which we release as part of HILL MIXE Suite. Interfaces for Section 3 are shown in Figs. 2 and 3; the interface used Sections 4 is depicted in Fig. 4.

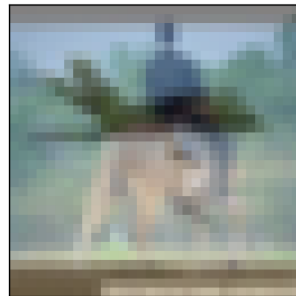

Your goal is to construct an image that would likely be *rated by 100 other crowdsourced workers* as a **50% mixture** between the two classes: **[Horse, Airplane]**.

Press "g" to make the image more like a Horse. Press "h" to make the image more like an Airplane.

When you think the image would be *perceived by 100 other crowdsourced workers* as a **50/50 combination** between the two classes, then please, click Continue.

Continue

Figure 2: Construct interface where participants press arrow keys to select  $\tilde{x}$ .

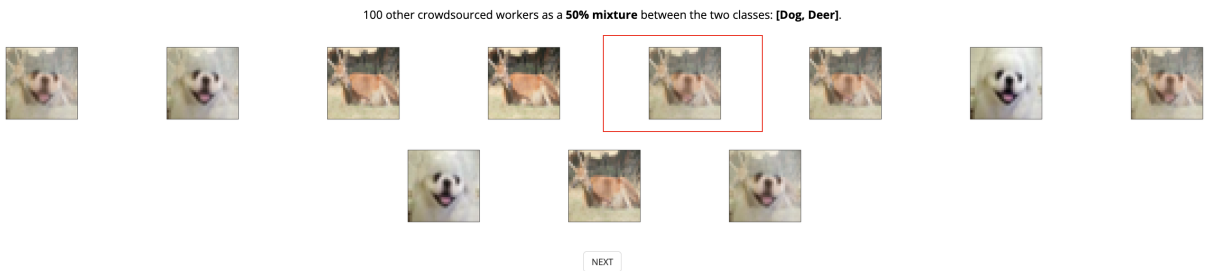

Figure 3: Interface for the selection of a given  $\lambda_g$  from a set of possible mixed images.

Imagine 100 crowdsourced workers are told that the following image is a combination of images from the following classes: **Airplane** and **Automobile**.

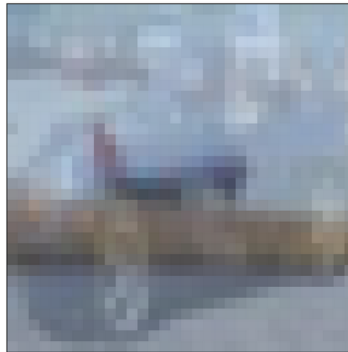

What combination of the classes do you think they would say is used to make this image?

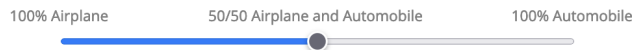

How confident do you think the crowdsourced workers would be in this estimate?

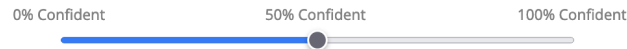

Continue

Figure 4: Interface for inferring the *mixup* generative label parameter and providing confidence in such inference.

## E ALTERNATIVE SYNTHETIC EXAMPLE CATEGORY COMPOSITION ELICITATION

Given human participants are uncertain about the underlying mixing coefficient in a number of cases, we consider whether the category composition typically used in *mixup* – e.g., placing mass only on the labels of the images used to form the synthetic combined sample – are reasonable. As demonstrated in the main text and in Fig. 5, a synthetic *mixup* image may look like something else entirely.

We therefore consider a follow-up small-scale human elicitation study wherein we relax the *mixup* assumption that the label mixing function must output a label constructed only from the two classes used to form the mixed image – and instead collect  $\tilde{y}$  directly by showing the mixed image to human annotators in the form of soft labels. This provides a comparison to the previous human-annotated endpoint label mixing coefficients, and can further inspire useful designs for the label mixing policy.

### E.1 STUDY DESIGN

We recruit  $N = 8$  participants again from Prolific [Palan and Schitter, 2018], yielding soft labels over a total of 100 mixed images. Each participant saw 25 mixed images; each mixed image of the 100 was seen by two participants. The images are drawn from the same set of stimuli created in Section 4; however, here, we only show images with a mixing coefficient  $\in \{0.25, 0.5, 0.75\}$ . Participants are told that images are formed by combining other images, and are asked to provide what they think others would see in the image. Participants are asked to specify what others would view as the most probable

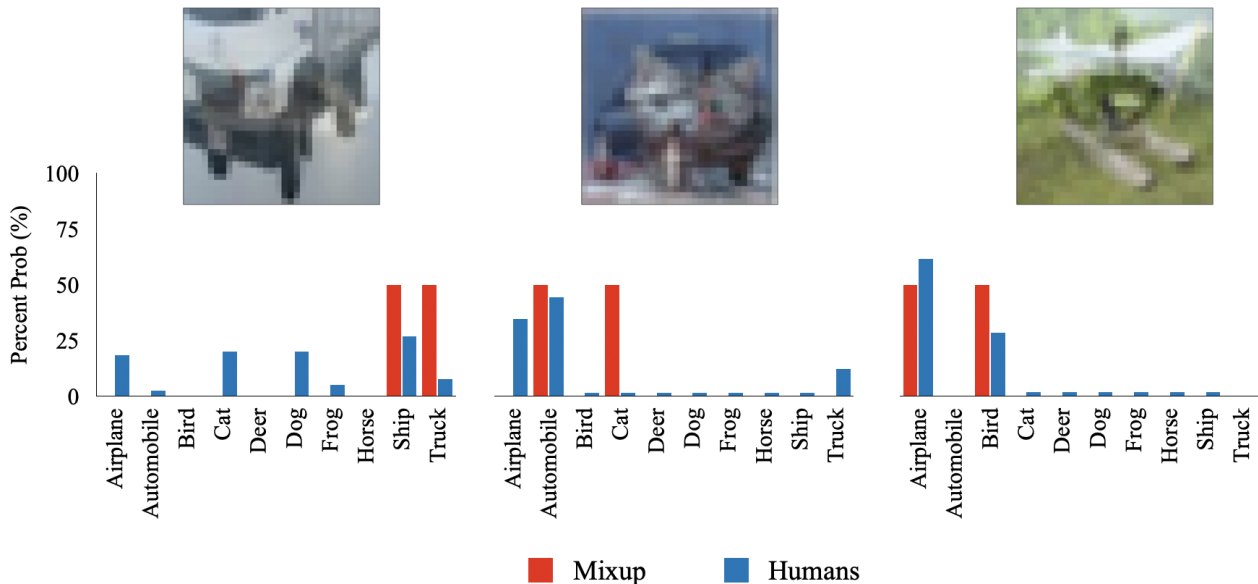

Figure 5: Additional example soft labels elicited from individuals. Original *mixup* label for each associated image is shown in red; the soft label elicited from humans (averaged over two individuals) is shown in blue. The left and center examples involve substantial discrepancies between human percepts and the label which would be used in *mixup*; the rightmost image highlights that some percepts do match the underlying mixing components (even without being informed of the underlying classes). Examples are deliberately chosen to illustrate the range of soft labels elicited; all examples are include in H-Mix.

category with an associated percentage (on a scale of 0-100), an optional second most probable category with a probability, and any categories that would be perceived as definitely not in the image. Again employing the third-person viewpoint framing borrowed from [Chung et al., 2019]. We rely on the soft label elicitation interface proposed in [Collins et al., 2022] and modify the instructions to be better suited combinations of images. Following Collins et al., we construct “Top 2 Clamp” labels with a redistribution factor of 0.1, which controls how we spread mass over any categories still leftover as “possible” once accounting for those ruled out as definitely not possible.

## E.2 ANALYZING ELICITED SOFT LABELS FOR SYNTHETIC IMAGES

We explore the correspondence between the elicited category compositions of the mixed images with the labels that would be used to generate the mixed image (as would be used in traditional *mixup*; i.e., placing mass only on two categories). While participants did tend to place probability mass on the generating endpoints that correlated with the mixing coefficient used (Pearson  $r = 0.52$ ), interestingly, we find that participants report thinking that 38.3% ( $\pm 0.6\%$ ) of the probability mass of a label should be placed on *different* classes from those which are used to create the image. This is remarkable and suggests that mixed images *do not* consistently look like the labels used to create them, corroborate similar trends found in [Gruber et al., 2018] wherein humans endorse categories which are not present in the image. Hence, alternative labelings even beyond the kind we explore in the main text may be preferred which are more aligned with human percepts. Examples of such labeled mixed images are shown in Fig. 5 and the main text.

**Takeaways** The typical two-category labels used in *mixup* *do not* consistently match human perception. We find that human annotators often assign probabilities to alternate classes when asked to label a mixed image. This suggests that the pursuit of aligning synthetic data labeling to match human perception, at least for the synthetic data constructor used in *mixup*, warrants the design of alternative label mixing functions  $g_{\text{rich}}$  which yield richer label distributions over a broader range of categories.

## References

- Eric Arazo, Diego Ortego, Paul Albert, Noel E O'Connor, and Kevin McGuinness. Pseudo-labeling and confirmation bias in deep semi-supervised learning. In *International Joint Conference on Neural Networks*, 2020. 2
- James M Beale and Frank C Keil. Categorical effects in the perception of faces. *Cognition*, 57(3):217–239, 1995. 1
- Randolph Blake and Nikos K Logothetis. Visual competition. *Nature Reviews Neuroscience*, 3(1):13–21, 2002. 1
- Paola Cascante-Bonilla, Fuwen Tan, Yanjun Qi, and Vicente Ordonez. Curriculum labeling: Revisiting pseudo-labeling for semi-supervised learning. *arXiv preprint arXiv:2001.06001*, 2020. 2
- Valerie Chen, Umang Bhatt, Hoda Heidari, Adrian Weller, and Ameet Talwalkar. Perspectives on incorporating expert feedback into model updates. *arXiv preprint arXiv:2205.06905*, 2022. 1
- John Joon Young Chung, Jean Y. Song, Sindhu Kutty, Sungsoo (Ray) Hong, Juho Kim, and Walter S. Lasecki. Efficient elicitation approaches to estimate collective crowd answers. In *CSCW*, 2019. 2, 6
- Katherine M Collins, Umang Bhatt, and Adrian Weller. Eliciting and learning with soft labels from every annotator. In *HCOMP*, 2022. 3, 6
- Nathan Destler, Manish Singh, and Jacob Feldman. Shape discrimination along morph-spaces. *Vision Research*, 158: 189–199, 2019. 1
- Jacob Feldman. Mutual information and categorical perception. *Psychological Science*, 32(8):1298–1310, 2021. 1
- Naomi H Feldman, Thomas L Griffiths, and James L Morgan. The influence of categories on perception: explaining the perceptual magnet effect as optimal statistical inference. *Psychological review*, 116(4):752, 2009. 1
- Jonathan R. Folstein, Isabel Gauthier, and Thomas J. Palmeri. How category learning affects object representations: not all morphspaces stretch alike. *Journal of experimental psychology. Learning, memory, and cognition*, 38 4:807–20, 2012. 1
- Jonathan R Folstein, Thomas J Palmeri, and Isabel Gauthier. Category learning increases discriminability of relevant object dimensions in visual cortex. *Cerebral Cortex*, 23(4):814–823, 2013. 1
- Liron Z Gruber, Aia Haruvi, Ronen Basri, and Michal Irani. Perceptual dominance in brief presentations of mixed images: Human perception vs. deep neural networks. *Frontiers in Computational Neuroscience*, 12:57, 2018. 1, 6
- Dan Hendrycks, Andy Zou, Mantas Mazeika, Leonard Tang, Bo Li, Dawn Song, and Jacob Steinhardt. Pixmix: Dreamlike pictures comprehensively improve safety measures. In *CVPR*, 2022. 2
- Divyansh Kaushik, Eduard Hovy, and Zachary C Lipton. Learning the difference that makes a difference with counterfactually-augmented data. *arXiv preprint arXiv:1909.12434*, 2019. 1
- Divyansh Kaushik, Amrith Setlur, Eduard H. Hovy, and Zachary C. Lipton. Explaining the efficacy of counterfactually-augmented data. *ICLR*, 2021. 1
- Jang-Hyun Kim, Wonho Choo, and Hyun Oh Song. Puzzle mix: Exploiting saliency and local statistics for optimal mixup. In *ICML*, 2020a. 2
- JangHyun Kim, Wonho Choo, Hosan Jeong, and Hyun Oh Song. Co-mixup: Saliency guided joint mixup with supermodular diversity. In *ICLR*, 2020b. 2
- Patricia K Kuhl. Human adults and human infants show a “perceptual magnet effect” for the prototypes of speech categories, monkeys do not. *Perception & psychophysics*, 50(2):93–107, 1991. 1
- Fiona N Newell and Heinrich H Bülhoff. Categorical perception of familiar objects. *Cognition*, 85(2):113–143, 2002. 1
- Quang Nguyen, Hamed Valizadegan, and Milos Hauskrecht. Learning classification models with soft-label information. *Journal of the American Medical Informatics Association*, 21, 11 2013. 3
- Aude Oliva, Antonio Torralba, and Philippe G. Schyns. Hybrid images. *ACM Transactions on Graphics*, 25(3):527–532, 2006. 1



- Stefan Palan and Christian Schitter. Prolific. ac—a subject pool for online experiments. *Journal of Behavioral and Experimental Finance*, 17:22–27, 2018. 5
- Joshua C Peterson, Ruairidh M Battleday, Thomas L Griffiths, and Olga Russakovsky. Human uncertainty makes classification more robust. In *ICCV*, 2019. 3
- Zeju Qiu, Weiyang Liu, Tim Z Xiao, Zhen Liu, Umang Bhatt, Yucen Luo, Adrian Weller, and Bernhard Schölkopf. Iterative teaching by data hallucination. *arXiv preprint arXiv:2210.17467*, 2022. 2
- Kate Sanders, Reno Kriz, Anqi Liu, and Benjamin Van Durme. Ambiguous images with human judgments for robust visual event classification. In *NeurIPS*, 2022. 3
- Jy-yong Sohn, Liang Shang, Hongxu Chen, Jaekyun Moon, Dimitris Papailiopoulos, and Kangwook Lee. Genlabel: Mixup relabeling using generative models. *arXiv preprint arXiv:2201.02354*, 2022. 2
- Kihyuk Sohn, David Berthelot, Nicholas Carlini, Zizhao Zhang, Han Zhang, Colin A Raffel, Ekin Dogus Cubuk, Alexey Kurakin, and Chun-Liang Li. Fixmatch: Simplifying semi-supervised learning with consistency and confidence. In H. Larochelle, M. Ranzato, R. Hadsell, M.F. Balcan, and H. Lin, editors, *NeurIPS*, 2020. 2
- Yuji Tokozume, Yoshitaka Ushiku, and Tatsuya Harada. Learning from between-class examples for deep sound recognition. *arXiv preprint arXiv:1711.10282*, 2017. 2
- Yuji Tokozume, Yoshitaka Ushiku, and Tatsuya Harada. Between-class learning for image classification. In *Proceedings of the IEEE Conference on Computer Vision and Pattern Recognition*, pages 5486–5494, 2018. 2
- Frank Tong, Ming Meng, and Randolph Blake. Neural bases of binocular rivalry. *Trends in cognitive sciences*, 10(11): 502–511, 2006. 1
- Vikas Verma, Alex Lamb, Christopher Beckham, Amir Najafi, Ioannis Mitliagkas, David Lopez-Paz, and Yoshua Bengio. Manifold mixup: Better representations by interpolating hidden states. In *ICML*, 2019. 2
- Kailas Vodrahalli, Tobias Gerstenberg, and James Zou. Do humans trust advice more if it comes from AI? an analysis of human-ai interactions. *arXiv preprint arXiv:2107.07015*, 2021. 2
- Jiaheng Wei, Zhaowei Zhu, Tianyi Luo, Ehsan Amid, Abhishek Kumar, and Yang Liu. To aggregate or not? learning with separate noisy labels. *arXiv preprint arXiv:2206.07181*, 2022. 3
- S. Yun, D. Han, S. Chun, S. Oh, Y. Yoo, and J. Choe. Cutmix: Regularization strategy to train strong classifiers with localizable features. In *ICCV*, 2019. 2
- Omar Zaidan, Jason Eisner, and Christine Piatko. Using “annotator rationales” to improve machine learning for text categorization. In *NAACL*, 2007. 1
- Yuxuan Zhang, Huan Ling, Jun Gao, Kangxue Yin, Jean-Francois Lafleche, Adela Barriuso, Antonio Torralba, and Sanja Fidler. Datasetgan: Efficient labeled data factory with minimal human effort. In *CVPR*, 2021. 1
